1 **Prevalence and associated factors of premarital sexual behavior among undergraduate**  
2 **youths of management colleges of Dhangadhi Sub-Metropolitan city, Kailali, Nepal**

3

4 Short title:

5 Premarital sexual behavior among youths in Nepal

6

7 Princy Bhatta<sup>1,2\*</sup>, Min Bahadur Kunwar<sup>1</sup>, Arun Kumar Joshi<sup>3</sup>, Dharma Dev Bhatta<sup>4</sup>, Ankit

8 Acharya<sup>1,2</sup>

9

10 <sup>1</sup>Department of Public Health, Nobel College, Pokhara University, Kathmandu, Nepal;

11 <sup>2</sup>Sustainable Public Health, Katunje-5, Bhaktapur;

12 <sup>3</sup>Chitwan Medical College, Bharatpur, Nepal;

13 <sup>4</sup>Aishwarya Multiple Campus, Dhangadhi, Nepal.

14

15 \*Corresponding author:

16 [princybhatta56@gmail.com](mailto:princybhatta56@gmail.com), contact: +977 9842032310.

## 17 **Abstract**

## 18 **Background**

19 Although sexuality remains a taboo in Nepali society, the prevalence of premarital sexual activities  
20 is increasing. Youth who begin early premarital sexual activity are more likely to be engaged in  
21 unsafe sex. This study aims to determine the prevalence and associated factors of premarital sex  
22 among college-going youths of Dhangadhi Sub-Metropolitan City, Kailali (DSMC).

## 23 **Methodology**

24 This descriptive cross-sectional study was conducted in management colleges with Bachelor of  
25 Business Studies (BBS) programs in DSMC. The sample size for the study was 374. The  
26 probability proportionate to size sampling technique was adopted for sample estimation for the  
27 selected colleges. The data was entered, cleaned, and analyzed in SPSS26. Bivariate analysis was  
28 done using Pearson's chi-square test was used to determine differences between groups. A simple  
29 logistic regression model was conducted to assess the association between several characteristics  
30 of the respondents and the outcome variable- premarital sex, followed by multiple logistic  
31 regression to evaluate the combined impacts of various predictors on premarital sex.

## 32 **Results**

33 The prevalence of premarital sex among undergraduate college youths was 35.3%, of which 52.3%  
34 were males. Among those undergraduate youths, more than half (51.5%) had experienced their  
35 first intercourse before 18 years of age. At least 1 out of 10 respondents reported that their  
36 intercourse led to pregnancy. In model I, in simple logistic regression, predictors such as age,  
37 gender, relationship status, dating experience (p-value < 0.001), communication with parents (p-  
38 value = 0.002), family type (p-value = 0.020), and family income (p-value = 0.002) were  
39 significantly associated with premarital sex. Furthermore, not living with parents, parent's

40 education level, friends with sex partners, friends having dating experience, and awareness that  
41 friends have sex were also among the factors significantly associated with premarital sex. In the  
42 multiple logistic regression, in Model II, relationship status (aOR, 44.47; 95% CI: 7.88, 251.08),  
43 dating experience (aOR, 24.00; 95% CI: 5.36, 107.58), discussion about sexual health with parents  
44 (aOR, 8.16; 95% CI: 2.25, 29.62), and knowing friends who had premarital sex (aOR, 15.82; 95%  
45 CI: 2.92, 85.61) were significantly associated with premarital sex after controlling for potential  
46 confounding predictors.

#### 47 **Conclusion**

48 Sex education interventions within and beyond educational institutions are crucial to increase the  
49 level of awareness and protect the physical, mental, and social health of young unmarried partners  
50 in Nepal.

#### 51 **Keywords**

52 Premarital sex, Youths, Nepal.

## 53 **Introduction**

54 In 2018, the global youth population was 1.2 billion, with over 490 million young people in South  
55 Asia (1). In Nepal, young people aged 15-24 years constitute 19.71% of the total population (2).  
56 This young group of population demands high-quality sexual health care to address their specific  
57 sexual health needs and rights. Yet, poor understanding and awareness of sexuality and well-being  
58 complemented by limited access to sexual and reproductive health (SRH) services have been a  
59 major challenge for youths in low-and-middle-income countries (LMICs) to ensure a healthy  
60 transition to adulthood (3). Societies in LMICs across the world, where the majority of the youths  
61 reside, often associate immorality with young people's sexuality and sexual practices before  
62 marriage. Because of these, young people are more likely to engage in risky sexual behaviors and  
63 may suffer physically, mentally, psycho-socially, and financially from its outcomes. Not only this,  
64 taboos related to sexuality are one of the major factors for the communication gap between youths  
65 and adults in those societies (3-5).

66 Premarital sex, also known as non-marital sex, youthful sex, adolescent sex, and young-adult sex,  
67 refers to sexual activity practiced before a couple is married (6). Advancements in science and  
68 technological innovations resulted in increased access to mobile phones with the internet, making  
69 it easy for young people to have social and romantic interactions (7, 8). Nepal Adolescents and  
70 Youth Survey 2010/11 reports that 12.98% of young people aged 15-24 years are involved in  
71 premarital sex (23.4% boys and 3.66% girls) (9). According to the Nepal Demographic and Health  
72 Survey 2022, 2% of never-married women and 25% of never-married men aged 15-24 had  
73 premarital sexual experience. The proportion of premarital sex has increased from less than 1% in  
74 2006 to 2% in 2022 among never-married women, and from 17% in 2006 to 25% in 2016 and

75 2022(10). The recent demographic survey also highlights that 9% of women and 2% of men had  
76 their first sexual intercourse by age 15, i.e., before the legal age of marriage(10).

77 Sexual behavior including premarital sex is still a sensitive topic under discussion in Nepali society  
78 (9). Therefore, youths are not adequately informed about the right choices to prevent themselves  
79 and their partners from several negative health outcomes such as sexually transmitted infections  
80 (STIs), human immune virus and acquired immune deficiency syndrome (HIV and AIDS), teenage  
81 pregnancy, unsafe abortions, mental distress, and maternal deaths among many others (3, 11-13).  
82 Given this situation, there is a need to understand the factors that lead to premarital sexual behavior  
83 among young people to develop and implement interventions that are contextually appropriate and  
84 accepted. This study aims to assess factors affecting premarital sex among college-going youths  
85 of Dhangadhi Sub-Metropolitan City, Kailali (DSMC).

86

## 87 **Materials and methods**

### 88 **Study design, respondents, and setting**

89 This cross-sectional study was conducted among 18-24 years Bachelor in Business Studies (BBS)  
90 program students of Dhangadhi Sub-Metropolitan City (DSMC), Kailali from July 18, 2022, to  
91 July 26, 2022.

92

### 93 **Sampling frame, sample size, and sampling procedure**

94 A multistage proportionate simple random sampling technique was used in this study. At first, the  
95 sampling frame was defined through a complete enumeration of all 4 colleges having BBS  
96 programs within DMPC. The sample size was determined using the sample size calculation  
97 method for proportions with finite population correction. The sample size from each college was

98 obtained using the probability proportionate to size technique. The lottery method was used to  
99 select the academic year (1<sup>st</sup> 2<sup>nd</sup> or 3<sup>rd</sup> or 4<sup>th</sup>) for data collection. For those academic years with  
100 multiple classrooms, a classroom was selected by using a lottery method.

101

102 *Sample size calculation:*

103 The sample size for this study was 374, which was determined using the following formula with  
104 finite population correction:

$$105 \quad n = \frac{\frac{Z^2 P(1 - P)}{d^2}}{1 + \frac{\left(\frac{Z^2 P(1 - P)}{d^2}\right)}{(N - 1)}}$$

106 Where,

107 n = desired sample size

108 z = standard normal variable at 95% Confidence Level i.e. (1.96)

109 p = proportion in the target population estimated to have particular characteristics (according to  
110 the study on premarital sexual behavior in 2021, 38.1% college youths have had premarital sex)

111 d = degree of accuracy required, set at 0.05 level

$$112 \quad \frac{\frac{Z^2 P(1 - P)}{d^2}}{1 + \frac{\left(\frac{Z^2 P(1 - P)}{d^2}\right)}{(N - 1)}} = \frac{\frac{1.96^2 * 0.38 (1 - 0.38)}{0.05^2}}{1 + \frac{\left(\frac{1.96^2 * 0.38(1 - 0.38)}{0.05^2}\right)}{(5194 - 1)}} = 340 \text{ (approx)}$$

113 Assuming the non-response of 10%, the final sample size was 340 + 34 = 374.

114

## 115 **Data Collection Technique and Tools**

116 The principal investigator of the study did an extensive literature review to develop a structured  
117 questionnaire. This was followed by incorporating experts' opinions to ensure the completeness

118 and quality of the tool. The questionnaire was then pretested among 10% of the total sample size  
119 at another college of Dhangadhi, Kailali where data collection was not planned. The pretested  
120 questionnaire was modified accordingly, distributed among all consenting youths (374), and  
121 collected immediately after completing the survey.

122

### 123 **Data Management and Analysis Plan**

124 All questionnaire forms were gathered and checked for completeness and accuracy, and to  
125 ensure that they were ready for entry purposes. Data entry was done in SPSS V26, followed  
126 by data cleaning and data analysis. A backup of the original dataset was done and stored in a  
127 backup storage device and online storage system for future retrieval and use. Descriptive  
128 analysis was performed to describe the characteristics of the respondents. Bivariate analysis  
129 was done using Pearson's chi-square test was used to determine differences between groups. A  
130 simple logistic regression model was conducted to assess the association between several  
131 characteristics of the respondents and the outcome variable- premarital sex. This was followed by  
132 multiple logistic regression to assess the combined impacts of multiple predictors on  
133 premarital sex. Model I for crude odds ratio and model II for adjusted odds ratios were  
134 reported, along with 95% Confidence Intervals (95% CIs). P-value < 0.05 was considered to  
135 be statistically significant.

136

### 137 **Ethical Consideration**

138 The ethical approval for this study was obtained from the Institution Review Committee (IRC)  
139 at Nobel College, Pokhara University. Before data collection, letters from the Department of  
140 Public Health at Nobel College were provided to all the colleges from where samples were

141 collected. After the completion of data collection, a letter of data collection completion was  
142 obtained from each college. The objectives of the research, potential harm and benefit to the  
143 respondents were explained to all respondents along with the approximate time required for  
144 the interview, confidentiality, anonymity of data obtained, and the option to withdraw from  
145 the interview at any time if they felt uncomfortable. Written consent was taken from each  
146 respondent who agreed to participate in the study.

147

## 148 **Results**

149 A total of 374 respondents participated in this study. The mean age and standard deviation of the  
150 respondents were 20.37 years and 1.164 years respectively. Almost three-fifths (59.4%) of  
151 respondents were male. The majority of the respondents (92.8%) followed Hinduism. More than  
152 one-third of the respondents represented Chhetri ethnicity, and nearly one-third of the respondents  
153 belonged to the Brahman community. The majority of the respondents (69.0%) were currently  
154 pursuing the second year of their undergraduate studies. Majority of the respondents (69.8%) were  
155 single. Out of 5, nearly 2 respondents (39.7%) received daily pocket money from their parents.  
156 Most of the respondents (96.0%) didn't discuss sexual health with parents. More than half of the  
157 respondents (60.3%) never had a dating experience in their life.

158 Among all respondents, more than half (62.6%) belonged to the nuclear family. More than half of  
159 the respondent's family income was between 20,000-30,000. The majority of the respondents  
160 (69.5%) lived with their parents. In regards to parents' educational status, nearly one-third of  
161 mothers were not able to read and write (32.4%) while all fathers were able to. Nearly one-half of  
162 respondents' fathers had a secondary or higher level of education (48.3%) as compared to only  
163 14.2% of mothers. More than half (50.4%) of respondent's father's occupations were in agriculture



164 and the majority (73.0%) of respondent's mothers were engaged in household work. The majority  
165 (96.3%) of respondents' parental marital status was married.  
166 More than half (55.5 %) of the respondents do not consume any alcohol products. Among the  
167 drinkers, the majority (77.1%) of the respondents' drink alcohol only during festivals. The majority  
168 of the respondents (75.1%) do not smoke tobacco products. Among the smokers, more than half  
169 (53.8%) of the respondents smoke only during festivals, followed by 22.6% of the respondents  
170 smoking frequently and 16.15 smoking regularly. The majority (94.7%) of the respondents do not  
171 consume drugs. More than half (56.7%) of the respondents watched porn movies. Among those  
172 who watched porn movies, 1 out of 10 respondents (11.8%) watched it every day. Almost two-  
173 thirds (63.6%) of the respondents perceived it was okay to have premarital sex. Table 1 shows the  
174 individual, family, and behavioral characteristics of the respondents.

175

176 Table 1: Individual, family, and behavioral characteristics of the respondents (n=374)

|                                     | Frequency (n) | Percent (%) |
|-------------------------------------|---------------|-------------|
| <b>Individual Characteristics</b>   |               |             |
| <b>Age (Mean + SD): 20.37+1.164</b> |               |             |
| Under 20                            | 85            | 22.7        |
| 20 and above                        | 289           | 77.3        |
| <b>Gender</b>                       |               |             |
| Male                                | 222           | 59.4        |
| Female                              | 152           | 40.6        |
| <b>Ethnicity</b>                    |               |             |
| Brahman                             | 113           | 30.2        |

|                                                            |     |      |
|------------------------------------------------------------|-----|------|
| Chhetri                                                    | 132 | 35.3 |
| Janajati                                                   | 82  | 21.9 |
| Aadhibasi                                                  | 32  | 8.6  |
| Dalit                                                      | 15  | 4.0  |
| <b>Religion</b>                                            |     |      |
| Hindu                                                      | 347 | 92.8 |
| Christian                                                  | 27  | 7.2  |
| <b>Academic year</b>                                       |     |      |
| First Year                                                 | 98  | 26.2 |
| Second Year                                                | 258 | 69.0 |
| Third Year                                                 | 18  | 4.8  |
| <b>Relationship status</b>                                 |     |      |
| Single                                                     | 261 | 69.8 |
| In a relationship                                          | 113 | 30.2 |
| <b>Pocket money (n=373)</b>                                |     |      |
| Yes                                                        | 148 | 39.7 |
| No                                                         | 225 | 60.3 |
| <b>Discussion about sexual health with parents (n=373)</b> |     |      |
| Yes                                                        | 15  | 4.0  |
| No                                                         | 358 | 96.0 |
| <b>Dating experience (n=373)</b>                           |     |      |
| Yes                                                        | 148 | 39.7 |
| No                                                         | 225 | 60.3 |

| <b>Family characteristics</b>      |     |      |
|------------------------------------|-----|------|
| <b>Family type</b>                 |     |      |
| Nuclear                            | 234 | 62.6 |
| Joint                              | 140 | 37.4 |
| <b>Monthly income</b>              |     |      |
| <10,000                            | 9   | 2.4  |
| 10,000-20,000                      | 57  | 15.2 |
| 20,000-30,000                      | 205 | 54.8 |
| >30,000                            | 103 | 27.5 |
| <b>Living arrangement</b>          |     |      |
| With parents                       | 259 | 69.3 |
| Without parents                    | 115 | 30.7 |
| <b>Father's education (n= 346)</b> |     |      |
| Can read and write                 | 63  | 16.9 |
| Primary level                      | 103 | 27.6 |
| Secondary level                    | 91  | 24.4 |
| Higher Secondary                   | 53  | 14.2 |
| Bachelor and above                 | 36  | 9.7  |
| <b>Mother's education</b>          |     |      |
| Unable to read and write           | 121 | 32.4 |
| Can read and write                 | 130 | 34.8 |
| Primary level                      | 70  | 18.7 |
| Secondary level                    | 25  | 6.7  |

|                                     |     |      |
|-------------------------------------|-----|------|
| Higher Secondary                    | 16  | 4.3  |
| Bachelor and above                  | 12  | 3.2  |
| <b>Father's occupation (n= 371)</b> |     |      |
| Household works                     | 11  | 3.0  |
| Agriculture                         | 187 | 50.4 |
| Public service                      | 52  | 14.0 |
| Private service                     | 13  | 3.5  |
| Business                            | 65  | 17.5 |
| Foreign Employment                  | 30  | 8.1  |
| Labor                               | 13  | 3.5  |
| <b>Mother's occupation (n= 373)</b> |     |      |
| Household works                     | 273 | 73.0 |
| Agriculture                         | 65  | 17.4 |
| Public service                      | 10  | 2.7  |
| Private service                     | 11  | 2.9  |
| Business                            | 13  | 3.5  |
| Labor                               | 1   | 0.3  |
| <b>Marital status of parents</b>    |     |      |
| Married                             | 360 | 96.3 |
| Separated                           | 4   | 1.1  |
| Divorced                            | 5   | 1.3  |
| Widowed                             | 5   | 1.3  |
| <b>Behavioral Characteristics</b>   |     |      |

|                                    |     |      |
|------------------------------------|-----|------|
| <b>Drink any alcohol products</b>  |     |      |
| Yes                                | 170 | 45.5 |
| No                                 | 204 | 55.5 |
| <b>Drinking alcohol (n=170)</b>    |     |      |
| Regularly                          | 2   | 1.2  |
| Weekly                             | 4   | 2.4  |
| Monthly                            | 4   | 2.4  |
| Frequently                         | 29  | 17.1 |
| Only on festivals                  | 131 | 77.1 |
| <b>Smoke any tobacco products</b>  |     |      |
| Yes                                | 93  | 24.9 |
| No                                 | 281 | 75.1 |
| <b>Smoking (n=93)</b>              |     |      |
| Regularly                          | 15  | 16.1 |
| Weekly                             | 3   | 3.2  |
| Monthly                            | 4   | 4.3  |
| Frequently                         | 21  | 22.6 |
| Only on festivals                  | 50  | 53.8 |
| <b>Consumption of drugs</b>        |     |      |
| Yes                                | 20  | 5.3  |
| No                                 | 354 | 94.7 |
| <b>Consumption of drugs (n=20)</b> |     |      |
| Regularly                          | 1   | 5.0  |

|                                                       |     |      |
|-------------------------------------------------------|-----|------|
| Monthly                                               | 2   | 10.0 |
| Frequently                                            | 9   | 45.0 |
| Only on festivals                                     | 8   | 40.0 |
| <b>Started using drugs (n=20)</b>                     |     |      |
| Before the college                                    | 9   | 45.0 |
| After the college                                     | 11  | 55.0 |
| <b>Watch porn movies</b>                              |     |      |
| Yes                                                   | 212 | 56.7 |
| No                                                    | 162 | 43.3 |
| <b>Watching porn movies (212)</b>                     |     |      |
| Everyday                                              | 25  | 11.8 |
| Once a week                                           | 66  | 31.1 |
| Once a month                                          | 46  | 21.7 |
| Once a year                                           | 34  | 16.0 |
| Frequently                                            | 41  | 19.3 |
| <b>Is it okay to have sex before marriage (n=365)</b> |     |      |
| Yes, it is okay                                       | 232 | 63.6 |
| No, it is not okay                                    | 133 | 36.4 |

177

178 Among the respondents, more than one-third (35.5%) of the respondents had experienced  
 179 premarital sexual experience. More than half (51.5%) had experienced premarital sex between the  
 180 age of 14 and 18 years. More than one-half (50.8%) of the respondents had their first sex after  
 181 college. About two-thirds (63.4%) of the respondent's reason for first sexual intercourse was falling

182 in love. More than 1 in 10 (12.1%) respondents reported that their involvement in sexual  
183 intercourse resulted in pregnancy. The majority (78.0%) of the respondents reported that they  
184 didn't use condoms during their first sexual intercourse. Among non-users, more than half (52.5%)  
185 of the respondents reported that the trust factor played an important role in not using condoms  
186 during sexual intercourse. The majority (76.5%) of the respondents didn't have sex with  
187 commercial sex workers while 23.5% had. Among those who had sex with commercial sex  
188 workers, the majority (74.2%) of the respondents used condoms. More than one-half (50.8%) of  
189 the respondents had only one sex partner, followed by more than one-third of the respondents  
190 (37.1%) having more than 3 or more partners.

191 Among the respondents who had a premarital sexual history, the majority (95.5%) of the  
192 respondents had premarital sex in the last 12 months (n=132). More than half (67.5%) of the  
193 respondents had one partner in the past 12 months. The majority (80.2%) of the respondents had  
194 sex with a boy/girlfriend in the past 12 months. More than three-fourths (77.0) of the respondents  
195 didn't use condoms during sexual intercourse in the past 12 months. Nearly half (48.5%) of the  
196 respondents didn't use condoms due to the reason of trusting their partner. The majority (84.8%)  
197 of the respondents didn't have guilt of having premarital sex. Table 2 shows the premarital sexual  
198 history and the current sexual experience of the respondents.

199

200 Table 2: Premarital sexual history and current sexual experience of the respondents

|                                                                 | <b>Frequency<br/>(n)</b> | <b>Percent<br/>(%)</b> |
|-----------------------------------------------------------------|--------------------------|------------------------|
| <b>The premarital sexual history of the respondents (n=374)</b> |                          |                        |
| <b>Ever had premarital sex</b>                                  |                          |                        |

|                                                      |     |      |
|------------------------------------------------------|-----|------|
| Yes                                                  | 132 | 35.3 |
| No                                                   | 242 | 64.7 |
| <b>Age at first intercourse</b>                      |     |      |
| 14-18                                                | 68  | 51.5 |
| 19-23                                                | 64  | 48.5 |
| <b>First sexual intercourse</b>                      |     |      |
| Before college                                       | 65  | 49.2 |
| After college                                        | 67  | 50.8 |
| <b>Reason for premarital sex</b>                     |     |      |
| Fall in love                                         | 83  | 63.4 |
| Desire for sex                                       | 47  | 35.9 |
| Peer pressure                                        | 1   | 0.8  |
| <b>Ever become pregnant/partner pregnant (n=132)</b> |     |      |
| Yes                                                  | 16  | 12.1 |
| No                                                   | 116 | 87.9 |
| <b>Use a condom during first sexual intercourse</b>  |     |      |
| Yes                                                  | 29  | 22.0 |
| No                                                   | 103 | 78.0 |
| <b>Reason for not using a condom (n=103)</b>         |     |      |
| Ashamed to ask the partner                           | 7   | 6.8  |
| Ashamed to buy a condom                              | 2   | 1.9  |
| Trust partner                                        | 53  | 52.5 |
| Partner objected                                     | 8   | 7.8  |



|                                                                        |     |      |
|------------------------------------------------------------------------|-----|------|
| Used another contraceptive                                             | 3   | 2.9  |
| Drunk                                                                  | 4   | 3.9  |
| Decreased Satisfaction                                                 | 26  | 25.2 |
| <b>Sex with commercial sex workers</b>                                 |     |      |
| Yes                                                                    | 31  | 23.5 |
| No                                                                     | 101 | 76.5 |
| <b>Use condoms with commercial sex workers (n=31)</b>                  |     |      |
| Yes                                                                    | 23  | 74.2 |
| No                                                                     | 8   | 25.8 |
| <b>Number of sex partners by now</b>                                   |     |      |
| Only one                                                               | 67  | 50.8 |
| Two                                                                    | 16  | 12.1 |
| Three and above                                                        | 49  | 37.1 |
| <b>Current premarital sexual experience of the respondents (n=132)</b> |     |      |
| <b>Have premarital sex in the past 12 months</b>                       |     |      |
| Yes                                                                    | 126 | 95.5 |
| No                                                                     | 6   | 4.5  |
| <b>Number of sex partners in the past 12 months (n=126)</b>            |     |      |
| One                                                                    | 85  | 67.5 |
| Two                                                                    | 21  | 16.7 |
| Three                                                                  | 20  | 15.9 |
| <b>With whom did you have sex in the past 12 months (n=126)</b>        |     |      |
| Boy/Girl Friend                                                        | 101 | 80.2 |

|                                                                |     |      |
|----------------------------------------------------------------|-----|------|
| Commercial Sex worker                                          | 11  | 8.7  |
| Teacher                                                        | 1   | 0.8  |
| Non-regular partner                                            | 13  | 10.3 |
| <b>Use a condom during the last sexual intercourse (n=126)</b> |     |      |
| Yes                                                            | 29  | 23.0 |
| No                                                             | 97  | 77.0 |
| <b>Reason for not using a condom (n=97)</b>                    |     |      |
| Ashamed to Ask my partner                                      | 5   | 5.2  |
| Trust partner                                                  | 47  | 48.5 |
| Partner objected                                               | 5   | 1.3  |
| used other contraceptives                                      | 1   | 0.3  |
| Drunk                                                          | 3   | 3.1  |
| Decreased satisfaction                                         | 36  | 37.1 |
| <b>Have guilt of having premarital sex (n=132)</b>             |     |      |
| Yes                                                            | 20  | 15.2 |
| No                                                             | 112 | 84.8 |

201

202 The majority (75.7%) of the respondents reported that their friends had boys/girlfriends. The

203 majority (73.0%) of the respondents shared that they were aware of their friend's dating experience.

204 More than one-third (33.5%) of the respondents knew about the sexual intercourse of their friends.

205 Among those who had sex, the majority (67.4%) of the respondents reported that their friends

206 suggested they initiate their sexual intercourse. More than one-fifth (22.1%) of the respondents

207 reported that their sexual behavior was influenced by girls' clothing styles. Table 3 shows the peer  
 208 influence on the respondents.

209

210 Table 3: Peer influence of the respondents (n=374)

| <b>Peer Influence</b>                                                     | <b>Frequency(n)</b> | <b>Percent (%)</b> |
|---------------------------------------------------------------------------|---------------------|--------------------|
| <b>Friends have boy/girlfriend</b>                                        |                     |                    |
| Yes                                                                       | 283                 | 75.7               |
| No                                                                        | 91                  | 24.3               |
| <b>Friends have dating experience</b>                                     |                     |                    |
| Yes                                                                       | 273                 | 73.0               |
| No                                                                        | 101                 | 27.0               |
| <b>Know that your friends have experienced sexual intercourse (n=373)</b> |                     |                    |
| Yes                                                                       | 125                 | 33.5               |
| No                                                                        | 248                 | 66.5               |
| <b>Friends suggested you initiate your sexual intercourse (n=132)</b>     |                     |                    |
| Yes                                                                       | 89                  | 67.4               |
| No                                                                        | 43                  | 32.6               |
| <b>Girls Wearing style influence your behavior (n=222)</b>                |                     |                    |
| Yes                                                                       | 49                  | 22.1               |
| No                                                                        | 173                 | 77.9               |

211

212 The association between premarital sex and individual, family, behavioral, and peer influence  
213 characteristics was assessed using bivariate logistic regression, in model I. Age, gender, academic  
214 year, relationship status, dating experience, family type, living arrangement, discussion about  
215 sexual health with parents, drinking any alcohol products, smoking any tobacco products,  
216 consumption of drugs, watching porn, friends with boyfriends/girlfriends, and friends who had  
217 premarital sex were among the predictors that were significantly associated with premarital sex  
218 ( $p$ -value  $\leq 0.05$ ). In the multiple logistic regression, in Model II, relationship status, dating  
219 experience, discussion about sexual health with parents, and knowing friends who had premarital  
220 sex were significantly associated with premarital sex after controlling for potential confounding  
221 predictors, ( $p$ -value  $\leq 0.05$ ). In reference to those youths who were singly by relationship status,  
222 youths who were in a romantic relationship had 44.47 higher odds of having premarital sex (aOR,  
223 44.47; 95% CI: 7.88, 251.08). In reference to those who had no dating experience, youths who had  
224 dating experience had 24 higher odds of having premarital sex (aOR, 24.00; 95% CI: 5.36, 107.58).  
225 In reference to those who lived with parents, those who lived without parents had 8.16 higher odds  
226 of having premarital sex (aOR, 8.16; 95% CI: 2.25, 29.62). Similarly, in reference to those who  
227 had no idea if their friends had had sex, those who knew their friends had had sex with their  
228 romantic partner had 15.82 higher odds of having premarital sex (aOR, 15.82; 95% CI: 2.92,  
229 85.61). However, after the adjustments, associations were no longer statistically significant for  
230 substance abuse (drinking alcohol, smoking tobacco, consuming drugs) and watching  
231 pornographic movies. Similar was true for friends with boyfriend/girlfriend, and knowing friends  
232 who date their partners.

233

234 Table 4: Premarital sexual behavior and associated factors among undergraduate youth of  
 235 management colleges of Dhangadhi Sub-Metropolitan city, Kailali, Nepal (n=374)

| Independent Variables | Dependent variable (Premarital sex) |            | <sup>a</sup> Model I; cOR (95% CI) | <sup>b</sup> Model II; aOR (95% CI) |
|-----------------------|-------------------------------------|------------|------------------------------------|-------------------------------------|
|                       | Yes n (%)                           | No n (%)   |                                    |                                     |
| <b>AGE</b>            |                                     |            |                                    |                                     |
| Under 20 (85)         | 15 (17.6)                           | 70 (82.4)  | Reference category                 | Reference category                  |
| 20 and above (289)    | 117 (40.5)                          | 172 (59.5) | <b>3.17 (1.73, 5.81) *</b>         | 1.19 (0.16, 8.60)                   |
| <b>Gender</b>         |                                     |            |                                    |                                     |
| Male (222)            | 116 (52.3)                          | 106 (47.7) | <b>9.30 (5.20, 16.63)*</b>         | 3.214 (0.40, 25.59)                 |
| Female (152)          | 16 (10.5)                           | 136 (89.5) | Reference category                 | Reference category                  |
| <b>Ethnicity</b>      |                                     |            |                                    |                                     |
| Brahman (113)         | 33 (29.2)                           | 80 (70.8)  | Reference category                 |                                     |
| Chhetri (132)         | 45 (34.1)                           | 87 (65.9)  | 1.25 (0.73, 2.16)                  |                                     |
| Janajati (82)         | 32 (39.0)                           | 50 (61.0)  | 1.55 (0.85, 2.83)                  |                                     |
| Aadhibasi (32)        | 14 (43.8)                           | 18 (56.3)  | 1.89 (0.84, 4.23)                  |                                     |
| Dalit (15)            | 8 (53.3)                            | 7 (46.7)   | 2.77 (0.93, 8.26)                  |                                     |
| <b>Religion</b>       |                                     |            |                                    |                                     |
| Hindu (347)           | 120(34.6)                           | 227(65.4)  | Reference category                 |                                     |
| Christian (27)        | 12(44.4)                            | 15(55.6)   | 1.51 (0.69, 3.34)                  |                                     |
| <b>Academic year</b>  |                                     |            |                                    |                                     |
| First year (98)       | 23 (23.5)                           | 75 (76.5)  | Reference category                 | Reference category                  |

|                                                            |            |            |                                |                              |
|------------------------------------------------------------|------------|------------|--------------------------------|------------------------------|
| Second year<br>(258)                                       | 96 (37.2)  | 162 (62.8) | <b>1.93 (1.14, 3.29)*</b>      | 1.61 (0.33, 7.85)            |
| Third year (18)                                            | 13 (72.2)  | 5 (27.8)   | <b>8.48 (2.73, 26.31)*</b>     | 3.17 (0.07, 137.73)          |
| <b>Relationship status</b>                                 |            |            |                                |                              |
| Single (261)                                               | 30 (11.5)  | 231 (88.5) | Reference category             | Reference category           |
| In a relationship<br>(113)                                 | 102 (90.3) | 11 (9.7)   | <b>71.40 (34.44, 148.03)*</b>  | <b>44.47 (7.88, 251.08)*</b> |
| <b>Pocket money status</b>                                 |            |            |                                |                              |
| Yes (148)                                                  | 60 (40.5)  | 88 (59.5)  | 1.45 (0.94, 2.23)              |                              |
| No (225)                                                   | 72 (32.0)  | 153 (68.0) | Reference category             |                              |
| <b>Dating Experience</b>                                   |            |            |                                |                              |
| Yes (148)                                                  | 124 (83.8) | 24 (16.2)  | <b>140.15 (61.11, 321.40)*</b> | <b>24.00 (5.36, 107.58)*</b> |
| No (225)                                                   | 8 (3.6)    | 217 (96.4) | Reference category             | Reference category           |
| <b>Family Type</b>                                         |            |            |                                |                              |
| Nuclear (234)                                              | 93 (39.7)  | 141 (60.3) | <b>1.71 (1.09, 2.69)*</b>      | 2,29 (0.61, 8.70)            |
| Joint (140)                                                | 39 (27.9)  | 101 (72.1) | Reference category             | Reference category           |
| <b>Living arrangement</b>                                  |            |            |                                |                              |
| With parents<br>(259)                                      | 48 (18.5)  | 211 (81.5) | Reference category             | Reference category           |
| Without parents<br>(115)                                   | 84 (73.0)  | 31 (27.0)  | <b>11.91 (7.10, 19.99)*</b>    | <b>8.16 (2.25, 29.62)*</b>   |
| <b>Discussion about sexual health with parents (n=373)</b> |            |            |                                |                              |
| Yes (15)                                                   | 11 (73.3)  | 4 (26.7)   | <b>5.39 (1.68, 17.27)*</b>     | 3.31 (0.25, 44.50)           |

|                                         |            |            |                    |                    |
|-----------------------------------------|------------|------------|--------------------|--------------------|
| No (358)                                | 121 (33.8) | 237 (66.2) | Reference category | Reference category |
| <b>Marital status of parents</b>        |            |            |                    |                    |
| Married (360)                           | 124 (34.4) | 236 (65.6) | Reference category |                    |
| Separated/<br>Divorced/<br>Widowed (14) | 8 (57.1)   | 6 (42.9)   | 2.54 (0.86, 7.48)  |                    |
| <b>Father's education (n=373)</b>       |            |            |                    |                    |
| Educated (90)                           | 33 (36.7)  | 57 (63.3)  | 1.08 (0.66, 1.76)  |                    |
| Uneducated<br>(283)                     | 99 (35.0)  | 184 (66.7) | Reference category |                    |
| <b>Mother's Education</b>               |            |            |                    |                    |
| Educated (251)                          | 91 (36.3)  | 160 (63.7) | 1.14 (0.72, 1.79)  |                    |
| Uneducated<br>(123)                     | 41 (33.3)  | 82 (66.7)  | Reference category |                    |
| <b>Family Income</b>                    |            |            |                    |                    |
| <10,000 (9)                             | 2 (22.2)   | 7 (77.8)   | Reference category |                    |
| 10,000-20,000<br>(57)                   | 19 (33.3)  | 38 (66.7)  | 1.75 (0.33, 9.25)  |                    |
| 20,000-30,000<br>(205)                  | 59 (28.8)  | 146 (71.2) | 1.41 (0.29, 7.01)  |                    |
| More than<br>30,000 (103)               | 52 (50.5)  | 51 (49.5)  | 3.57 (0.71, 18.00) |                    |
| <b>Drink any alcohol products</b>       |            |            |                    |                    |

|                                                    |               |            |                               |                             |
|----------------------------------------------------|---------------|------------|-------------------------------|-----------------------------|
| Yes (170)                                          | 111<br>(65.3) | 59 (34.7)  | <b>16.40 (9.50, 28.45)*</b>   | 1.67 (0.37, 7.47)           |
| No (204)                                           | 21 (10.3)     | 183 (89.7) | Reference category            | 1                           |
| <b>Smoke any tobacco products</b>                  |               |            |                               |                             |
| Yes (93)                                           | 70 (75.3)     | 23 (24.7)  | <b>10.75 (6.21, 18.61)*</b>   | 3.01 (0.63, 14.28)          |
| No (281)                                           | 62 (22.1)     | 219 (77.9) | Reference category            | Reference category          |
| <b>Consumption of Drugs</b>                        |               |            |                               |                             |
| Yes (20)                                           | 15 (75.0)     | 5 (25.0)   | <b>6.08 (2.16, 17.13)*</b>    | 7.44 (0.48, 115.11)         |
| No (354)                                           | 117<br>(33.1) | 237 (66.9) | Reference category            | Reference category          |
| <b>Watch porn movies</b>                           |               |            |                               |                             |
| Yes (212)                                          | 128<br>(60.4) | 84 (39.6)  | <b>60.19 (21.49, 168.56)*</b> | 2.57 (0.32, 20.77)          |
| No (162)                                           | 4 (2.5)       | 158 (97.5) | Reference category            | Reference category          |
| <b>Friends have boy/girlfriend</b>                 |               |            |                               |                             |
| Yes (283)                                          | 124 (43.8)    | 159 (56.2) | <b>8.09 (3.77, 17.35)*</b>    | 1.32 (0.05, 37.48)          |
| No (91)                                            | 8 (8.8)       | 83 (91.2)  | Reference category            | Reference category          |
| <b>Friends have dating experience</b>              |               |            |                               |                             |
| Yes (273)                                          | 123 (45.1)    | 150 (54.9) | <b>8.382 (4.06, 17.31)*</b>   | 0.26 (0.02, 4.54)           |
| No (101)                                           | 9 (8.9)       | 92 (91.9)  | Reference category            | Reference category          |
| <b>Know friends who had premarital sex (n=373)</b> |               |            |                               |                             |
| Yes (125)                                          | 91 (72.8)     | 34 (27.2)  | <b>13.51 (8.06, 22.67)*</b>   | <b>15.82 (2.92, 85.61)*</b> |
| No (248)                                           | 41 (16.5)     | 207 (83.5) | Reference category            | Reference category          |



236 \*p-value < 0.05 at 95% Confidence Level

237 <sup>a</sup>Model I, unadjusted odds ratio; <sup>b</sup>Model II, unadjusted odds ratio

238

## 239 **Discussion**

240 This study found that the prevalence of premarital sex among undergraduate college youths in  
241 DMPC was 35.3%. Studies conducted in other parts of Nepal have reported a lower prevalence of  
242 premarital sex: Kathmandu 13.5% (14), Pokhara 24.6% (15), Jhapa 25% (16) and Web-based  
243 survey 21.2% (17). Among those who experienced premarital sex, one in two youths experienced  
244 it after they were enrolled in college and before the age of 18 years. This study also found that  
245 almost 4 of 5 respondents did not use condoms during their first sexual intercourse, and 1 of 10  
246 sexual encounters led to pregnancy. Although adolescents report trust factor to be a cause for not  
247 using contraceptives during sex, the underlying reasons are logistic barriers such as lack of access  
248 to free condoms, financial dependence, and shyness to buy condoms from a health facility or  
249 pharmacy (18). This study found that almost 1 out of 4 youths had sex with commercial sex  
250 workers, and among those youths almost 3 out of 4 used condoms. This is possibly due to increased  
251 awareness of HIV and AIDS transmission among youths and to avoid the risk of transmission of  
252 STIs including HIV and AIDS (19).

253 This study found that nearly half of the youths had multiple sex partners with more than one-third  
254 of youths having more than 2 sex partners. Similar findings have been presented by Paudel and  
255 colleagues in their web-based study in Nepal (17) and by Upreti and Acharya (14) in Kathmandu.  
256 In this study, almost two-thirds of the respondents perceived that it was okay to have premarital  
257 sex, and among those who ever had premarital sex, the majority didn't have any guilt about having  
258 premarital sex. This presents the changing dynamics of Nepali society on sex and sexuality as

259 youths nowadays do not hesitate to make boyfriends/girlfriends, stay in romantic relationships,  
260 and enjoy sex life before marriage without regrets. Although Nepali society has accepted these  
261 kinds of behavior with increasing awareness of sexual freedom and rights, such practices may lead  
262 to an increased risk of unwanted pregnancy, maternal death, transmission of STIs, mental distress,  
263 violence, and suicide. Therefore, increased investment, awareness, and partnership for expanding  
264 sex education programs and interventions is crucial to make sure that youths make informed and  
265 meaningful decisions in their lives.

266 Peer influence is one of the major determinants for initiation of sexual activities among adolescents  
267 and youths. In this study, more than two-thirds of the respondents shared that they were aware of  
268 their friends' dating experiences, and more than one-third knew about their friends' sexual  
269 relationships. Not only this, among those who already had premarital sexual intercourse, more than  
270 two-thirds reported that it was their friend/s who suggested they initiate sex. This depicts that,  
271 friends, who are an important source of sex education in Nepali society, can influence the intention  
272 to initiation of sexual activities since discussing sex and sexuality with parents and other social  
273 networks is still not common (only 4% of youths discussed sexual health with parents) (20, 21).

274 Predictors such as age, gender, relationship status, dating experience, communication with parents,  
275 family type, not living with parents, parent's education level, friends with boyfriend/girlfriend,  
276 friends having dating experience, and awareness that friends have sex were also among the factors  
277 significantly associated with premarital sexual behavior. Several studies report that indulgence in  
278 substance abuse increases the likelihood of engaging in premarital sex (21, 22). Although watching  
279 pornographic content is illegal in Nepal following the government's porn ban to reduce the cases  
280 of sexual violence including rape since September 2018 (23), more than one-half of youths still  
281 watch porn videos on the internet.

282 Being a retrospective study, recall bias might have occurred while collecting responses from the  
283 respondents. Socially desirable responding (SDR) cannot be controlled for sensitive research  
284 where private data is asked. Some important variables such as “having a personal laptop or mobile  
285 phone”, “media exposure”, and “access to SRHR services” were missed in the questionnaire, but  
286 could potentially contribute to premarital sexual behavior.

287

## 288 **Conclusion**

289 This study revealed a high prevalence of premarital sex among college-going youths in DMPC,  
290 one of the vibrant cities of Sudurpaschim province in Nepal. This finding implies that there is a  
291 higher risk of STIs, HIV and AIDS, unwanted pregnancy, teenage pregnancy, abortion, violence,  
292 and mental health distress among the youths in Nepal. Discussing healthy relationships, and safer  
293 sex, and promoting sex education awareness programs within and beyond educational institutions  
294 is crucial to increase the level of awareness of young unmarried partners towards sexuality and  
295 well-being. Effective implementation of curriculum-based comprehensive sexuality education,  
296 and promoting peer-to-peer education as a method in sexual and reproductive health and rights  
297 promotion and risk communication among adolescents and youths must be encouraged by  
298 educational institutions or school-based clubs in Nepal. Incorporating creative and multi-channel  
299 approaches such as social and behavior change communication (SBCC) can influence positive  
300 behavior among youths and promote healthy indulgence in sexual activities. Investing in  
301 adolescents and youths, and improving access to sexual and reproductive health and rights is  
302 critical not only to prepare a healthy and capable youth force for the future but also to achieve the  
303 targets of sustainable development goals (SDGs).

304 **Acknowledgements**

305 We extend our profound gratitude to all faculties of Nobel College, Pokhara University and the  
306 research division of Sustainable Public Health Pvt. Ltd. for providing valuable guidance and  
307 insights in this study.

308

309 **References**

- 310 1. Nations U. World population prospects 2019. Vol (ST/ESA/SE A/424) Department of  
311 Economic and Social Affairs: Population Division. 2019.
- 312 2. National Population and Housing Census 2021 (National Report).  
313 Ramshahpath,Thapathali, Kathmandu, Nepal; 2023.
- 314 3. Alam P, Lin L, Thakkar N, Thaker A, Marston C. Socio-sexual norms and young people's  
315 sexual health in urban Bangladesh, India, Nepal and Pakistan: A qualitative scoping review.  
316 PLOS Glob Public Health. 2024;4(2):e0002179.
- 317 4. Van Reeuwijk M, Nahar P. The importance of a positive approach to sexuality in sexual  
318 health programmes for unmarried adolescents in Bangladesh. Reproductive health matters.  
319 2013;21(41):69-77.
- 320 5. Nahar Q, Tuñón C, Houvras I, Gazi R, Reza M, Huq NL. Reproductive health needs of  
321 adolescents in Bangladesh: A study report: International Centre for Diarrhoeal Diseases  
322 Research Bangladesh: Dhaka; 1999.
- 323 6. Cavendish M. Sex and society. London: Marshall Cavendish Corporation. 2010:577.
- 324 7. McCormack M. The role of smartphones and technology in sexual and romantic lives.  
325 2015.

- 326 8. Regmi PR, Simkhada P, van Teijlingen ER. There are too many naked pictures found in  
327 papers and on the net: Factors encouraging premarital sex among young people of Nepal. Health  
328 Science Journal. 2010;4(3):169-81.
- 329 9. Kathmandu N. Nepal Adolescents and Youth Survey. 2012.
- 330 10. Ministry of Health and Population [Nepal], New ERA, and ICF. 2023. Nepal  
331 Demographic and Health Survey 2022. Kathmandu, Nepal: Ministry of Health and Population  
332 [Nepal].
- 333 11. Adhikari N, Adhikari S. Attitude towards Premarital Sex among Higher Secondary  
334 Students in Pokhara Sub-Metropolitan City. J Community Med Health Educ 7: 564. doi:  
335 10.4172/2161-0711.1000564 Page 2 of 6 J Community Med Health Educ, an open access journal  
336 ISSN: 2161-0711 Volume 7• Issue 5• 1000564. were in early adolescent stage ie age group of.  
337 2017:14-6.
- 338 12. Shrestha RB. Premarital sexual behaviour and its impact on health among adolescents.  
339 Journal of Health Promotion. 2019;7(1):43-52.
- 340 13. Bhandari SD. Knowledge on Premarital Sex and its Consequences Among Adolescents at  
341 a Higher Secondary School. Medical Journal of Shree Birendra Hospital. 2014;13(1):37-9.
- 342 14. Upreti YR, Acharya D. Premarital Sexual Behaviours among Secondary School  
343 Adolescents: A Cross-sectional Study in Kathmandu. Journal of Health Promotion. 2020;8:39-  
344 52.
- 345 15. Adhikari N, Adhikari S, Sulemane NI. Premarital sexual behaviour among higher  
346 secondary students in Pokhara Sub-Metropolitan City Nepal. Sexual health. 2018;15(5):403-7.
- 347 16. Bhatta DN, Koirala A, Jha N. Adolescent students' attitude towards premarital sex and  
348 unwanted pregnancy. Health Renaissance. 2013;11(2):145-9.

- 349 17. Paudel A, Neupane A, Khadka S, Adhikari L, Paudel S, Kaphle M. Factors affecting  
350 Premarital Sex among Nepalese Undergraduates. *Journal of Public Health and Development*.  
351 2023;21(2):152-67.
- 352 18. Regmi PR, van Teijlingen E, Simkhada P, Acharya DR. Barriers to sexual health services  
353 for young people in Nepal. *Journal of health, population, and nutrition*. 2010;28(6):619.
- 354 19. Mahat G, Scoloveno MA. HIV/AIDS knowledge, attitudes and beliefs among Nepalese  
355 adolescents. *Journal of advanced nursing*. 2006;53(5):583-90.
- 356 20. Regmi P, van Teijlingen E, Silwal R, Dhital R. Role of social media for sexual  
357 communication and sexual behaviors: A focus group study among young people in Nepal.  
358 *Journal of Health Promotion*. 2022;10(1):153-66.
- 359 21. Dahal M, Subedi RK, Khanal S, Adhikari A, Sigdel M, Baral K, et al. Prevalence and  
360 Possible Risk Factor of Premarital Sexual Behaviour among Nepalese Adolescents. 2020.
- 361 22. Pahari S, Adhikari C. Premarital sexual behaviours of college youth of Tanahun district,  
362 Nepal. *Journal of Health and Allied Sciences*. 2021;11(1):30-7.
- 363 23. Karmacharya A. Ban your fears. *My Republica*. 2019.
- 364
